# Supplementary material for: Origin of the 3.6 V to 3.9 V voltage increase in the LiFeSO4F cathodes for Li-ion batteries
Source: Royal Society of Chemistry journal article supplement (doi:10.1039/c2ee22699e), 2012-01-01

## Supplementary materials

**Table SI-1:** Cation – Anion distances in the Fe and S first-coordination sphere for the *tavorite* and *triplite* corner delithiated phase FeSO<sub>4</sub>F.

|                        | Fe – O        | Fe – F        | S – O         |
|------------------------|---------------|---------------|---------------|
| <i>Tavorite</i>        | 2.01 – 2.02 Å | 1.96 Å        | 1.48 – 1.49 Å |
| <i>Triplite</i> corner | 2.00 – 2.06 Å | 1.93 – 1.98 Å | 1.48 – 1.49 Å |

**Table SI-2:** Unit cell parameters (in Å) and angles (in °) computed for the LiFeSO<sub>4</sub>F *tavorite* and *triplite* corner structures with various U<sub>eff</sub> values (in eV) and different magnetic orders (AFM = antiferromagnetic and FM = ferromagnetic) and compared to previous works and experiments. All calculations were performed using the same DFT+U formalism and the GGA-PBE functional for exchange and correlation energy.

| Phase                                       | U <sub>eff</sub><br>(eV) | Magn. | a (Å)      | b (Å)      | c (Å)     | α (°)       | β (°)      | γ (°)      |       |
|---------------------------------------------|--------------------------|-------|------------|------------|-----------|-------------|------------|------------|-------|
| LiFeSO <sub>4</sub> F<br>Tavorite           | This work                | 3     | FM         | 5.227      | 5.5314    | 7.3914      | 106.30     | 107.22     | 98.33 |
|                                             |                          | 3     | AFM        | 5.220      | 5.5397    | 7.3799      | 106.29     | 107.09     | 98.41 |
|                                             |                          | 4     | FM         | 5.218      | 5.5474    | 7.3880      | 106.28     | 107.10     | 98.43 |
|                                             |                          | 4     | AFM        | 5.218      | 5.5469    | 7.3848      | 106.23     | 107.11     | 98.45 |
|                                             |                          | 5     | FM         | 5.219      | 5.5488    | 7.3910      | 106.27     | 107.13     | 98.43 |
|                                             |                          | 5     | AFM        | 5.228      | 5.5431    | 7.3927      | 106.43     | 107.24     | 97.99 |
| Ref. 24                                     |                          | 4     | AFM        | 5.241      | 5.579     | 7.397       | 107.12     | 107.21     | 97.56 |
| Ref. 25                                     |                          | 4     | AFM        | 5.13       | 5.46      | 7.14        | 106.43     | 107.21     | 98.79 |
| Ref. 26                                     |                          | 3     | AFM        | 5.134      | 5.3087    | 7.1717      | 107.824    | 107.692    | 98.15 |
| DRX                                         |                          |       | 5.1747(3)  | 5.4943(3)  | 7.2224(3) | 106.522(3)  | 107.210(3) | 97.791(3)  |       |
| 300K Neutron                                |                          |       | 5.18003(7) | 5.49165(6) | 7.2289(9) | 106.4864(9) | 107.186(9) | 97.9098(9) |       |
| 2K Neutron                                  |                          |       | 5.205(1)   | 5.539(1)   | 7.274(1)  | 106.39(1)   | 107.21(1)  | 98.46(1)   |       |
| LiFeSO <sub>4</sub> F<br>Triplite<br>corner | This work                | 3     | FM         | 13.3086    | 6.3745    | 10.0603     | 90.00      | 120.42     | 90.00 |
|                                             |                          | 3     | AFM        | 13.2236    | 6.4413    | 9.7022      | 90.00      | 119.20     | 90.00 |
|                                             |                          | 4     | FM         | 13.2211    | 6.4593    | 9.9280      | 90.00      | 119.91     | 90.00 |
|                                             |                          | 4     | AFM        | 13.2216    | 6.4437    | 9.7012      | 90.00      | 119.16     | 90.00 |
|                                             |                          | 5     | FM         | 13.2399    | 6.4599    | 9.9436      | 90.00      | 120.01     | 90.00 |
|                                             |                          | 5     | AFM        | 13.2048    | 6.4333    | 9.6914      | 90.00      | 119.18     | 90.00 |
| DRX                                         |                          |       | 13.0225    | 6.3949     | 9.8329    | 90.00       | 119.6800   | 90.00      |       |

**Figure SI-1** Comparison of the experimental X-Ray diffraction pattern ( $\lambda_{K\alpha}(\text{Co}) = 1.79 \text{ \AA}$ ) of the  $\text{LiFeSO}_4\text{F}$  (bottom) and the delithiated  $\text{FeSO}_4\text{F}$  (top) *tavorite* structures with the simulated X-Ray diffraction patterns deduced from the DFT optimization. DFT+U structural relaxations being known to slightly over-estimate the lattice parameters of condensed phases, the lattice parameters of the DFT-optimized structures have been changed to the experimental ones for an easier comparison.

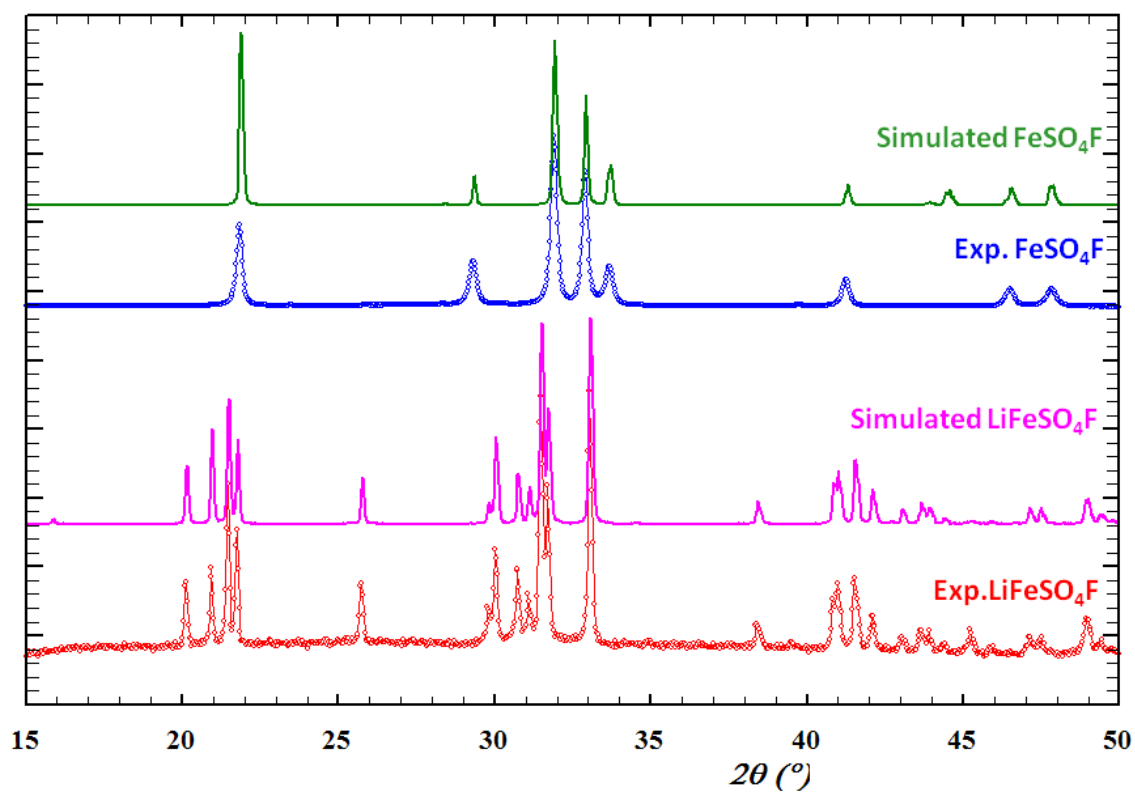

Supplement: c2ee22699e.pdf [file c2ee22699e.pdf]
